# Supplementary material for: Genome-Wide Identification and Characterization of G2-Like Transcription Factor Genes in Moso Bamboo (Phyllostachys edulis)
Source: MDPI journal article supplement (doi:10.3390/molecules27175491), 2022-08-26
Supplement: s1 [file s1]

Table S2. The MEME motif sequences and lengths of PeGLK proteins in moso bamboo.

| Motif | Width | Best possible match                                |
|-------|-------|----------------------------------------------------|
| 1     | 29    | KATPKSVLELMGVKGLTJYHVKSHLQKYR                      |
| 2     | 29    | LRTSKKPRLRWTPELHERFVDAVEQLGGP                      |
| 3     | 33    | LHEQLEVQRHLQLRIEAQGKYLQSILEKAQKAL                  |
| 4     | 21    | DSKKSMQJSEALRMQMEVQRR                              |
| 5     | 50    | VISDVHMPDMDGFKLLELVGLEMDLPVIMLSANGETKTVMKGITHGACDY |
| 6     | 50    | DQFPVGMRVLAVDDDDPTCLKVLETLLRCQYHVTTTGQAATALKMLRENK |
| 7     | 50    | HLYGGGHLELQQMERPMDSFLAFNESCIGSVGKKSPSHYSAAGKSPMVW  |
| 8     | 22    | LLKPVRIEELRNIWQHVVRRKF                             |
