# Supplementary material for: Genome-Wide Identification and Characterization of G2-Like Transcription Factor Genes in Moso Bamboo (Phyllostachys edulis)
Source: MDPI journal article supplement (doi:10.3390/molecules27175491), 2022-08-26
Supplement: s1 [file s1]

Table S3. The microarray data of 36 *PeGLK* genes in moso bamboo.

| Name           | leaf     | stem     | rhizome | root    |
|----------------|----------|----------|---------|---------|
| <i>PeGLK1</i>  | 0.984253 | 0.57124  | 0.67832 | 0.53432 |
| <i>PeGLK4</i>  | 1.12454  | 0.74621  | 0.85234 | 0.91527 |
| <i>PeGLK6</i>  | 0.73225  | 0.83145  | 0.73621 | 1.1355  |
| <i>PeGLK7</i>  | 1.18561  | 0.93672  | 0.83731 | 1.6381  |
| <i>PeGLK12</i> | 0.93526  | 0.62367  | 0.41963 | 0.67124 |
| <i>PeGLK20</i> | 0.962358 | 0.78342  | 0.63712 | 0.88523 |
| <i>PeGLK21</i> | 0.88724  | 0.61905  | 0.67522 | 1.07946 |
| <i>PeGLK28</i> | 0.91794  | 0.28798  | 0.21074 | 0.87593 |
| <i>PeGLK35</i> | 1.21654  | 0.41956  | 0.63621 | 0.65722 |
| <i>PeGLK36</i> | 0.96211  | 0.37986  | 0.46787 | 1.14839 |
| <i>PeGLK37</i> | 1.16443  | 0.38973  | 0.58931 | 0.94166 |
| <i>PeGLK39</i> | 0.97934  | 0.37014  | 0.25546 | 0.73654 |
| <i>PeGLK40</i> | 0.98615  | 0.42167  | 0.37024 | 0.55748 |
| <i>PeGLK44</i> | 1.11754  | 0.62673  | 0.97601 | 0.6172  |
| <i>PeGLK47</i> | 1.06945  | 0.91634  | 0.54242 | 0.47154 |
| <i>PeGLK48</i> | 1.01527  | 0.56953  | 0.3704  | 0.64153 |
| <i>PeGLK50</i> | 1.08492  | 0.75732  | 0.54156 | 0.57921 |
| <i>PeGLK51</i> | 1.0591   | 0.80332  | 0.22035 | 0.52156 |
| <i>PeGLK52</i> | 0.57052  | 0.8457   | 0.92254 | 0.46047 |
| <i>PeGLK53</i> | 0.76235  | 0.27563  | 0.84032 | 0.84356 |
| <i>PeGLK58</i> | 0.88976  | 0.64111  | 0.56832 | 0.42035 |
| <i>PeGLK59</i> | 0.91163  | 0.64843  | 0.73928 | 0.56857 |
| <i>PeGLK60</i> | 0.97385  | 1        | 0.87877 | 0.62037 |
| <i>PeGLK61</i> | 0.46549  | 0.33167  | 0.34575 | 0.94832 |
| <i>PeGLK62</i> | 0.92798  | 0.2285   | 0.55362 | 0.56037 |
| <i>PeGLK63</i> | 0.91659  | 1.31758  | 0.86778 | 0.85894 |
| <i>PeGLK65</i> | 1.03194  | 0.86231  | 0.34562 | 0.48031 |
| <i>PeGLK66</i> | 1.09692  | 0.81865  | 0.27653 | 0.42925 |
| <i>PeGLK67</i> | 1.03564  | 0.66952  | 0.84421 | 0.72045 |
| <i>PeGLK68</i> | 0.74256  | 0.559654 | 1.10452 | 0.73916 |
| <i>PeGLK69</i> | 1.05646  | 0.96328  | 0.77948 | 0.62739 |
| <i>PeGLK70</i> | 0.88795  | 0.35285  | 0.66359 | 0.39045 |
| <i>PeGLK71</i> | 0.56842  | 0.98253  | 0.70531 | 0.46321 |
| <i>PeGLK72</i> | 0.82116  | 0.34278  | 0.1782  | 0.60144 |
| <i>PeGLK75</i> | 1.11021  | 0.27324  | 0.34677 | 0.48055 |
| <i>PeGLK78</i> | 0.74623  | 0.38345  | 0.15824 | 0.98532 |
