# Supplementary material for: Genome-Wide Identification and Characterization of G2-Like Transcription Factor Genes in Moso Bamboo (Phyllostachys edulis)
Source: MDPI journal article supplement (doi:10.3390/molecules27175491), 2022-08-26
Supplement: s1 [file s1]

Table S5.

(A) Expression level of *PeGLK* genes in response to cold stress.

| Time<br>Gene ID | 0h   | 1h   | 3h    | 6h   | 12h   | 24h   |
|-----------------|------|------|-------|------|-------|-------|
| <i>PeGLK1</i>   | 1    | 2.4  | 4.2   | 2.5  | 4.5   | 3.9   |
| <i>PeGLK7</i>   | 1.73 | 2.89 | 5.88  | 5.37 | 20.83 | 26.8  |
| <i>PeGLK21</i>  | 1.32 | 1.56 | 2.81  | 3.95 | 5.02  | 5.11  |
| <i>PeGLK36</i>  | 2.6  | 2.8  | 18.4  | 4.7  | 14.8  | 28.2  |
| <i>PeGLK40</i>  | 6.7  | 12.8 | 20.45 | 35.6 | 43.45 | 38.9  |
| <i>PeGLK48</i>  | 1    | 3.89 | 4.26  | 4.31 | 3.29  | 3.11  |
| <i>PeGLK50</i>  | 1    | 0.58 | 0.82  | 1.31 | 3.18  | 2.55  |
| <i>PeGLK53</i>  | 1    | 1    | 5.21  | 8.23 | 10.6  | 12.2  |
| <i>PeGLK60</i>  | 1.35 | 1.89 | 22.8  | 40.9 | 80.9  | 35.42 |
| <i>PeGLK61</i>  | 1    | 0.82 | 0.95  | 4.15 | 2.59  | 2.02  |
| <i>PeGLK67</i>  | 1    | 2.61 | 2.02  | 1.54 | 1.86  | 1.72  |
| <i>PeGLK70</i>  | 1    | 0.38 | 0.65  | 0.57 | 0.41  | 0.32  |
| <i>PeGLK72</i>  | 1    | 2.1  | 3.5   | 7.9  | 15.1  | 22.6  |

(B) Expression level of *PeGLK* genes in response to osmotic stress.

| Time<br>Gene ID | 0h | 1h    | 2h    | 3h    | 6h    | 12h   |
|-----------------|----|-------|-------|-------|-------|-------|
| <i>PeGLK1</i>   | 1  | 0.62  | 0.68  | 3.79  | 2.55  | 2.83  |
| <i>PeGLK7</i>   | 1  | 1     | 13.58 | 8.21  | 10.32 | 16.11 |
| <i>PeGLK21</i>  | 1  | 1     | 3.71  | 3.55  | 5.09  | 5.32  |
| <i>PeGLK36</i>  | 1  | 4.68  | 10.62 | 20.78 | 28.67 | 32.92 |
| <i>PeGLK40</i>  | 1  | 1     | 1.84  | 1.38  | 4.71  | 1.59  |
| <i>PeGLK48</i>  | 1  | 2.8   | 1.6   | 2.34  | 3.39  | 2.59  |
| <i>PeGLK50</i>  | 1  | 0.82  | 1.73  | 2.31  | 2.02  | 1.58  |
| <i>PeGLK53</i>  | 1  | 1.77  | 4.32  | 7.11  | 9.29  | 3.51  |
| <i>PeGLK60</i>  | 1  | 0.53  | 0.99  | 0.82  | 4.85  | 2.58  |
| <i>PeGLK61</i>  | 1  | 0.62  | 0.55  | 0.58  | 0.42  | 0.47  |
| <i>PeGLK67</i>  | 1  | 1.94  | 8.32  | 6.11  | 12.78 | 22.72 |
| <i>PeGLK70</i>  | 1  | 18.91 | 20.78 | 25.8  | 52.91 | 10.56 |
| <i>PeGLK72</i>  | 1  | 0.84  | 0.63  | 0.59  | 0.52  | 0.38  |

(C) Expression level of *PeGLK* genes in response to MeJA treatment.

| Time<br>Gene ID | 0h | 1h    | 3h    | 6h    | 12h   |
|-----------------|----|-------|-------|-------|-------|
| <i>PeGLK1</i>   | 1  | 2.4   | 4.2   | 6.5   | 14.5  |
| <i>PeGLK7</i>   | 1  | 22.34 | 35.67 | 60.67 | 56.45 |
| <i>PeGLK21</i>  | 1  | 0.56  | 0.78  | 0.85  | 0.62  |
| <i>PeGLK36</i>  | 1  | 2.1   | 3.5   | 7.9   | 15.1  |
| <i>PeGLK40</i>  | 1  | 7.83  | 10.54 | 15.2  | 12.45 |
| <i>PeGLK48</i>  | 1  | 3.61  | 4.02  | 3.54  | 3.86  |

|                |   |      |      |       |       |
|----------------|---|------|------|-------|-------|
| <i>PeGLK50</i> | 1 | 5.73 | 6.32 | 13.45 | 10.79 |
| <i>PeGLK53</i> | 1 | 3.89 | 5.88 | 7.37  | 15.83 |
| <i>PeGLK60</i> | 1 | 3.41 | 4.55 | 4.27  | 3.22  |
| <i>PeGLK61</i> | 1 | 5.23 | 8.42 | 16.31 | 12.66 |
| <i>PeGLK67</i> | 1 | 2.46 | 3.42 | 4.15  | 4.67  |
| <i>PeGLK70</i> | 1 | 5.38 | 6.84 | 10.78 | 12.52 |
| <i>PeGLK72</i> | 1 | 3.42 | 3.55 | 4.33  | 5.33  |

(D) Expression level of *PeGLK* genes in response to GA treatment.

| Time<br>Gene ID | 0h | 1h    | 3h    | 6h    | 12h   |
|-----------------|----|-------|-------|-------|-------|
| <i>PeGLK1</i>   | 1  | 2.12  | 2.98  | 3.55  | 3.18  |
| <i>PeGLK7</i>   | 1  | 2.89  | 1.56  | 3.37  | 4.83  |
| <i>PeGLK21</i>  | 1  | 2.56  | 3.86  | 4.59  | 4.57  |
| <i>PeGLK36</i>  | 1  | 0.79  | 0.83  | 1.46  | 1.83  |
| <i>PeGLK40</i>  | 1  | 4.67  | 4.22  | 3.69  | 3.22  |
| <i>PeGLK48</i>  | 1  | 0.85  | 2.55  | 3.41  | 4.22  |
| <i>PeGLK50</i>  | 1  | 3.54  | 4.66  | 7.62  | 7.81  |
| <i>PeGLK53</i>  | 1  | 10.89 | 18.33 | 26.51 | 38.31 |
| <i>PeGLK60</i>  | 1  | 2.16  | 3.42  | 3.89  | 3.36  |
| <i>PeGLK61</i>  | 1  | 0.95  | 2.59  | 3.15  | 3.59  |
| <i>PeGLK67</i>  | 1  | 0.74  | 0.85  | 0.53  | 0.62  |
| <i>PeGLK70</i>  | 1  | 0.67  | 0.89  | 0.73  | 0.79  |
| <i>PeGLK72</i>  | 1  | 0.38  | 0.65  | 0.57  | 0.41  |
