# Supplementary material for: Genome-Wide Identification and Characterization of G2-Like Transcription Factor Genes in Moso Bamboo (Phyllostachys edulis)
Source: MDPI journal article supplement (doi:10.3390/molecules27175491), 2022-08-26
Supplement: s1 [file s1]

Table S1. Detailed information about *ZmGLK* genes in maize.

| Gene name      | Sequences ID      | MW(Da)   | PI   | CDS Length(bp) | Size(aa) |
|----------------|-------------------|----------|------|----------------|----------|
| <i>ZmGLK1</i>  | GRMZM2G009060_T01 | 39861.23 | 7.28 | 1080           | 359      |
| <i>ZmGLK2</i>  | GRMZM2G006477_T01 | 49645.57 | 6.16 | 1353           | 450      |
| <i>ZmGLK3</i>  | GRMZM2G113742_T01 | 29156.18 | 9.43 | 804            | 267      |
| <i>ZmGLK4</i>  | GRMZM2G056400_T01 | 47557.66 | 8.82 | 1377           | 458      |
| <i>ZmGLK5</i>  | GRMZM5G887276_T03 | 46203.21 | 8.73 | 1305           | 434      |
| <i>ZmGLK6</i>  | GRMZM2G039074_T02 | 45382.56 | 9.8  | 1284           | 427      |
| <i>ZmGLK7</i>  | GRMZM2G034563_T01 | 26111.26 | 6.92 | 747            | 248      |
| <i>ZmGLK8</i>  | GRMZM2G374986_T01 | 42557.7  | 9.3  | 1176           | 391      |
| <i>ZmGLK9</i>  | AC234520.1_FGT003 | 19591.43 | 9.56 | 561            | 186      |
| <i>ZmGLK10</i> | GRMZM2G124540_T01 | 35804.38 | 6.12 | 1017           | 338      |
| <i>ZmGLK11</i> | GRMZM2G379656_T01 | 16687.42 | 5.15 | 438            | 145      |
| <i>ZmGLK12</i> | GRMZM2G117193_T01 | 53169.28 | 7.22 | 1488           | 495      |
| <i>ZmGLK13</i> | GRMZM2G125704_T02 | 30274.45 | 9.19 | 816            | 271      |
| <i>ZmGLK14</i> | GRMZM2G035370_T01 | 51625.62 | 7.8  | 1404           | 467      |
| <i>ZmGLK15</i> | GRMZM2G069525_T01 | 33135.25 | 9.08 | 939            | 312      |
| <i>ZmGLK16</i> | GRMZM2G173882_T01 | 36735.53 | 7.02 | 1038           | 345      |
| <i>ZmGLK17</i> | GRMZM5G846506_T01 | 41247.17 | 9.47 | 1146           | 381      |
| <i>ZmGLK18</i> | GRMZM2G370425_T01 | 43773.75 | 6.65 | 1230           | 409      |
| <i>ZmGLK19</i> | GRMZM2G348238_T01 | 52172    | 5.8  | 1500           | 499      |
| <i>ZmGLK20</i> | GRMZM2G074908_T01 | 32180.44 | 5.68 | 915            | 304      |
| <i>ZmGLK21</i> | GRMZM2G087804_T03 | 49254.78 | 6.72 | 1386           | 461      |
| <i>ZmGLK22</i> | GRMZM2G396825_T01 | 32555.42 | 8.54 | 894            | 297      |
| <i>ZmGLK23</i> | GRMZM2G175827_T02 | 49074.33 | 9.16 | 1407           | 468      |
| <i>ZmGLK24</i> | GRMZM2G070865_T01 | 39524.16 | 6.71 | 1119           | 372      |
| <i>ZmGLK25</i> | GRMZM2G315506_T01 | 37640.56 | 8.66 | 1074           | 357      |
| <i>ZmGLK26</i> | GRMZM2G168002_T04 | 28660.53 | 6.59 | 813            | 270      |
| <i>ZmGLK27</i> | AC233960.1_FGT003 | 30635.8  | 8.4  | 840            | 279      |
| <i>ZmGLK28</i> | GRMZM2G052544_T01 | 40783.49 | 7.22 | 1131           | 376      |
| <i>ZmGLK29</i> | GRMZM2G083472_T01 | 33179.87 | 5.69 | 921            | 306      |
| <i>ZmGLK30</i> | GRMZM2G010920_T01 | 48305.91 | 6.61 | 1317           | 438      |
| <i>ZmGLK31</i> | GRMZM2G477238_T01 | 58738.69 | 6.21 | 1623           | 540      |
| <i>ZmGLK32</i> | GRMZM2G060834_T01 | 40092.95 | 7.41 | 1143           | 380      |
| <i>ZmGLK33</i> | GRMZM2G106185_T01 | 40665.18 | 9.85 | 1137           | 378      |
| <i>ZmGLK34</i> | GRMZM2G060485_T01 | 58845.41 | 6.36 | 1638           | 545      |
| <i>ZmGLK35</i> | GRMZM2G379167_T01 | 44260.81 | 6.57 | 1209           | 402      |
| <i>ZmGLK36</i> | GRMZM2G171468_T01 | 38386.96 | 5.33 | 1089           | 362      |
| <i>ZmGLK37</i> | GRMZM2G701218_T01 | 46434.86 | 6.53 | 1245           | 414      |
| <i>ZmGLK38</i> | AC219020.4_FGT002 | 59226.91 | 6.17 | 1665           | 554      |
| <i>ZmGLK39</i> | GRMZM2G117854_T03 | 28416.91 | 6.08 | 774            | 257      |
| <i>ZmGLK40</i> | GRMZM2G100709_T01 | 28085.27 | 7.71 | 771            | 256      |
| <i>ZmGLK41</i> | GRMZM2G398055_T01 | 31420.01 | 7.09 | 939            | 312      |

|                |                   |          |      |      |     |
|----------------|-------------------|----------|------|------|-----|
| <i>ZmGLK42</i> | AC155434.2_FGT005 | 39792.34 | 7.78 | 1104 | 367 |
| <i>ZmGLK43</i> | GRMZM2G064197_T01 | 27732.51 | 8.48 | 771  | 256 |
| <i>ZmGLK44</i> | GRMZM2G162409_T03 | 48417.02 | 5.14 | 1326 | 441 |
| <i>ZmGLK45</i> | GRMZM2G173943_T02 | 34026.39 | 5.95 | 939  | 312 |
| <i>ZmGLK46</i> | GRMZM2G082264_T01 | 48352.37 | 6.98 | 1434 | 477 |
| <i>ZmGLK47</i> | GRMZM2G100176_T01 | 39865.83 | 7.06 | 1110 | 369 |
| <i>ZmGLK48</i> | AC234155.1_FGT002 | 44110.34 | 6.23 | 1182 | 393 |
| <i>ZmGLK49</i> | GRMZM2G067702_T01 | 23717.77 | 6.55 | 660  | 219 |
| <i>ZmGLK50</i> | GRMZM2G471600_T01 | 30828.47 | 6.83 | 900  | 299 |
| <i>ZmGLK51</i> | GRMZM2G081671_T01 | 37367.17 | 7.7  | 1032 | 343 |
| <i>ZmGLK52</i> | GRMZM2G333083_T01 | 56361.35 | 6.48 | 1566 | 521 |
| <i>ZmGLK53</i> | GRMZM2G454449_T01 | 28049.28 | 8.59 | 762  | 253 |
| <i>ZmGLK54</i> | GRMZM2G026833_T01 | 50523.81 | 5.2  | 1431 | 476 |
| <i>ZmGLK55</i> | GRMZM2G124495_T01 | 49168.55 | 8.15 | 1377 | 458 |
| <i>ZmGLK56</i> | GRMZM2G016370_T01 | 48702.17 | 6.08 | 1362 | 453 |
| <i>ZmGLK57</i> | GRMZM2G159119_T01 | 49338.97 | 6.58 | 1380 | 459 |
| <i>ZmGLK58</i> | GRMZM2G090230_T01 | 35491.89 | 8.74 | 987  | 328 |
| <i>ZmGLK59</i> | GRMZM2G123308_T02 | 37355.24 | 7.35 | 1071 | 356 |

---
