# Supplementary material for: Genome-Wide Identification and Characterization of G2-Like Transcription Factor Genes in Moso Bamboo (Phyllostachys edulis)
Source: MDPI journal article supplement (doi:10.3390/molecules27175491), 2022-08-26
Supplement: s1 [file s1]

Table S4. The primers of qRT-PCR of 37 *PeGLKs* and *PeTIP41*.

| Genes          |          | Primers used in qRT-PCR(5'→3') |
|----------------|----------|--------------------------------|
| <i>PeGLK1</i>  | Forwards | CACCAACGACGAGGTCAAGA           |
|                | Reverse  | ACCTGCTCGACTGTTTCTGGA          |
| <i>PeGLK6</i>  | Forwards | ACGATTGCCGAAAGGCAGTA           |
|                | Reverse  | GGGAACCTCTTCAACTCGCA           |
| <i>PeGLK7</i>  | Forwards | AGTCGTATGAGCGTGCCAAA           |
|                | Reverse  | GAGCCTGTACACAGGGGAAC           |
| <i>PeGLK12</i> | Forwards | GGCCCCAACCATGGACATTA           |
|                | Reverse  | CCACCAAGGCCCTCGTAAAA           |
| <i>PeGLK20</i> | Forwards | CGGAGACTCTGAGGACAAGC           |
|                | Reverse  | CTGGGTTGCTGTGAAATGGC           |
| <i>PeGLK21</i> | Forwards | AAGGCCACTACGTTGGTGAG           |
|                | Reverse  | TTTCACGAGGGTCGAAAGGG           |
| <i>PeGLK28</i> | Forwards | TGCACCCTTGATCCCAAGTC           |
|                | Reverse  | TCCAAAGCACCAACGAGGTT           |
| <i>PeGLK35</i> | Forwards | GTCGCACTTAACCCAGGGAA           |
|                | Reverse  | CGCGCTTGCAAACCTAGATCC          |
| <i>PeGLK36</i> | Forwards | ATAAAAGCGCCGGTGATGGT           |
|                | Reverse  | TCCTGGTG CATATAGCTGCG          |
| <i>PeGLK37</i> | Forwards | ACGATCGAGAACTTCACCCG           |
|                | Reverse  | AACGGCTCCAACCATAAGGG           |
| <i>PeGLK39</i> | Forwards | GACTGTGCTGCTGACCTGAT           |
|                | Reverse  | TGCTGGACATCACCCCTTTC           |
| <i>PeGLK40</i> | Forwards | ACCA GTGATGCTAAGGCCAC          |
|                | Reverse  | TCAAGAGGGCGTTTCAAGCA           |
| <i>PeGLK44</i> | Forwards | TTGTTGAGGAGCGGGTTCAA           |
|                | Reverse  | TGGGACTCTAGGCCTCACAA           |
| <i>PeGLK47</i> | Forwards | ACGAGCAGCAGACATCAACA           |
|                | Reverse  | AGCTCGGCACTAGCAAAGTT           |
| <i>PeGLK48</i> | Forwards | GTTCACGTGGACGATCGAGA           |
|                | Reverse  | AACGGCTCCAACCATAAGGG           |
| <i>PeGLK50</i> | Forwards | GTCAAGGGCTGCTCAGATGT           |
|                | Reverse  | CGGGAACCTCGTAACGGTCAT          |
| <i>PeGLK51</i> | Forwards | AGATCCAGTTTGGGTCGCTG           |
|                | Reverse  | CGGCCCACCATTTGTTACAC           |
| <i>PeGLK52</i> | Forwards | CCATGCGAAATCTGCAGCAA           |
|                | Reverse  | TCGCGGTAACGTAAGCTCTC           |
| <i>PeGLK53</i> | Forwards | AAAAGTGCCGGAGATGGTGA           |

|                |          |                          |
|----------------|----------|--------------------------|
|                | Reverse  | TGGTGCATATAGCTGCGGAA     |
| <i>PeGLK58</i> | Forwards | GGACTGCCTGGCACTGTATT     |
|                | Reverse  | TGCCAAGCTGTTCAAATCGC     |
| <i>PeGLK59</i> | Forwards | AAGAAGAGCAAGTGGTCGCA     |
|                | Reverse  | AGTGTAGAGGTGCAACTGGC     |
| <i>PeGLK60</i> | Forwards | TCTGCCAGGGCCAATACAAG     |
|                | Reverse  | TGTAAGGAGATGGCCCGTA      |
| <i>PeGLK61</i> | Forwards | GTCGTGAGCTGCAGCAAAAA     |
|                | Reverse  | TCCCTACACTCTTCGCGGTA     |
| <i>PeGLK62</i> | Forwards | GAGGATAGAGTTCCACGCCG     |
|                | Reverse  | CTAAGCTCCCGATCGAACCC     |
| <i>PeGLK63</i> | Forwards | TGCTGCAGAGTGCACCAATA     |
|                | Reverse  | TTGCTCGAGTCCATTGTGCT     |
| <i>PeGLK65</i> | Forwards | CCAAGCGGCAAAACCATACC     |
|                | Reverse  | CAGCGGAAGAGGTTCAAGGT     |
| <i>PeGLK66</i> | Forwards | AAGAAGTGTTCCGGGTGCAA     |
|                | Reverse  | CCATGGGCAGGCACTAATGA     |
| <i>PeGLK67</i> | Forwards | GTTCTAAGGCCAGCGAGGTT     |
|                | Reverse  | CACACTCGCAGCAAGTCAAC     |
| <i>PeGLK68</i> | Forwards | CAGGGACAAAGCCGATTCTT     |
|                | Reverse  | CCAGTCCCCTCCACCAGATA     |
| <i>PeGLK69</i> | Forwards | CCCGATGCAGACAGGAATGT     |
|                | Reverse  | TGAGGTAGCTCCTCCTCACC     |
| <i>PeGLK70</i> | Forwards | GACGAGATCTACTCTGCCGC     |
|                | Reverse  | GGCCTTGGGCATGTGATTTG     |
| <i>PeGLK71</i> | Forwards | GCAAGGAGGAGGTTTCGTTGA    |
|                | Reverse  | GCTTTCGCTGCTATCTGTGC     |
| <i>PeGLK72</i> | Forwards | TGCAGACTCGGTTAGCACAG     |
|                | Reverse  | TGGATTGGAAGGCGAGAACC     |
| <i>PeGLK75</i> | Forwards | ACTGAAGCGCGAAAGCTAGT     |
|                | Reverse  | TCGCTGGTGGTGATGAAACA     |
| <i>PeGLK78</i> | Forwards | ACGTCAAGTGAATGGTCGCT     |
|                | Reverse  | TGGATTGGAAGGCGAGAACC     |
| <i>PeTIP41</i> | Forwards | AAAATCATTGTAGGCCATTGTCTG |
|                | Reverse  | ACTAAATTAAGCCAGCGGGAGTG  |
